# Supplementary material for: Indirect flood impacts and cascade risk across interdependent linear infrastructures
Source: Copernicus journal article supplement (doi:10.5194/nhess-21-1955-2021), 2021-06-24
Supplement: Supplementary file 1 [file nhess-21-1955-2021-supplement.zip]

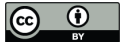

*Supplement of*

## **Indirect flood impacts and cascade risk across interdependent linear infrastructures**

**Chiara Arrighi et al.**

*Correspondence to:* Chiara Arrighi ([chiara.arrighi@unifi.it](mailto:chiara.arrighi@unifi.it))

- [nhess-21-1955-2021-supplement-title-page.pdf](#)
- [README.txt](#)
- [shared\\_data.gdb](#)
  - [a00000001.TablesByName.atx](#)
  - [a00000001.freelist](#)
  - [a00000001.gdbindexes](#)
  - [a00000001.gdbtable](#)
  - [a00000001.gdbtblx](#)
  - [a00000002.gdbtable](#)
  - [a00000002.gdbtblx](#)
  - [a00000003.gdbindexes](#)
  - [a00000003.gdbtable](#)
  - [a00000003.gdbtblx](#)
  - [a00000004.CatItemsByPhysicalName.atx](#)
  - [a00000004.CatItemsByType.atx](#)
  - [a00000004.FDO\\_UUID.atx](#)
  - [a00000004.freelist](#)
  - [a00000004.gdbindexes](#)
  - [a00000004.gdbtable](#)
  - [a00000004.gdbtblx](#)
  - [a00000004.spx](#)
  - [a00000005.CatItemTypesByName.atx](#)
  - [a00000005.CatItemTypesByParentTypeID.atx](#)
  - [a00000005.CatItemTypesByUUID.atx](#)

- a00000005.gdbindexes
- a00000005.gdbtable
- a00000005.gdbtblx
- a00000006.CatRelsByDestinationID.atx
- a00000006.CatRelsByOriginID.atx
- a00000006.CatRelsByType.atx
- a00000006.FDO\_UUID.atx
- a00000006.freelist
- a00000006.gdbindexes
- a00000006.gdbtable
- a00000006.gdbtblx
- a00000007.CatRelTypesByBackwardLabel.atx
- a00000007.CatRelTypesByDestItemTypeID.atx
- a00000007.CatRelTypesByForwardLabel.atx
- a00000007.CatRelTypesByName.atx
- a00000007.CatRelTypesByOriginItemTypeID.atx
- a00000007.CatRelTypesByUUID.atx
- a00000007.gdbindexes
- a00000007.gdbtable
- a00000007.gdbtblx
- a00000009.gdbindexes
- a00000009.gdbtable
- a00000009.gdbtblx
- a00000009.spx
- a0000001e.gdbindexes
- a0000001e.gdbtable
- a0000001e.gdbtblx
- a0000001e.spx
- a0000001f.gdbindexes
- a0000001f.gdbtable
- a0000001f.gdbtblx
- a0000001f.spx
- a00000020.gdbindexes
- a00000020.gdbtable
- a00000020.gdbtblx
- a00000020.spx
- a00000021.gdbindexes
- a00000021.gdbtable
- a00000021.gdbtblx
- a00000021.spx
- gdb
- timestamps

The copyright of individual parts of the supplement might differ from the article licence.
